# Supplementary material for: Efficient absorption of ammonia with dialkylphosphate-based ionic liquids
Source: Royal Society of Chemistry journal article supplement (doi:10.1039/d1nj02018h), 2021-01-01
Supplement: d1nj02018h1.pdf [file d1nj02018h1.pdf]

## Electronic Supplementary Information

Efficient absorption of ammonia with dialkylphosphate-based ionic liquids

Xiao Zhu <sup>a</sup>, Yunlan Shi <sup>a</sup>, Xiaolin Zhang <sup>b</sup>, Lei Yuan <sup>c</sup>, Sihan Wang <sup>a</sup>, Shaojuan Zeng <sup>c</sup>,

You Yu <sup>a\*</sup>

---

\* Corresponding author. E-mail address: [chemyuyou@163.com](mailto:chemyuyou@163.com) (You Yu)

**Table S1** The water contents of the ILs

| IL                       | [C <sub>4</sub> C <sub>1</sub> im]<br>[DBP] | [C <sub>4</sub> C <sub>1</sub> im]<br>[DMP] | [C <sub>2</sub> C <sub>1</sub> im]<br>[DEP] | [C <sub>2</sub> C <sub>1</sub> im]<br>[DMP] | [C <sub>1</sub> C <sub>1</sub> im]<br>[DMP] |
|--------------------------|---------------------------------------------|---------------------------------------------|---------------------------------------------|---------------------------------------------|---------------------------------------------|
| H <sub>2</sub> O<br>/ppm | 276                                         | 232                                         | 353                                         | 259                                         | 388                                         |

**Table S2** The density  $\rho$  and viscosity  $\eta$  of dialkylphosphate-based ILs at 298.15 K and 0.1 MPa

| Component   | $\rho/(\text{g}\cdot\text{cm}^{-3})$ |                     | $\eta/(\text{mPa}\cdot\text{s})$ |                      |
|-------------|--------------------------------------|---------------------|----------------------------------|----------------------|
|             | Exp.                                 | Lit.                | Exp.                             | Lit.                 |
| [bmim][DMP] | 1.1645                               | 1.1619 <sup>a</sup> | 543.01                           | 584.74 <sup>a</sup>  |
| [emim][DMP] | 1.2242                               | 1.22 <sup>a</sup>   | 249.67                           | 269.872 <sup>a</sup> |
| [emim][DEP] | 1.1466                               | 1.146 <sup>b</sup>  | 419.29                           | 410 <sup>c</sup>     |
| [mmim][DMP] | 1.2616                               | 1.2587 <sup>d</sup> | 290.32                           | 271.86 <sup>d</sup>  |
| [bmim][DBP] | 1.0454                               | <i>NA</i>           | 1741.1                           | <i>NA</i>            |

#### Reference

<sup>a</sup> Y H. Gong, C. Shen, Y.Z. Lu, H. Meng, C.X. Li, J. Chem. Eng. Data., 57 (2012) 33-39.

<sup>b</sup> W.M.D.W. Normazlan, N. A.Sairi, Y. Alias, A.F. Udaiyappan, A. Jouyban, M. Khoubnasabjafari, J. Chem. Eng. Data., 59 (2014) 2337-2348.

<sup>c</sup> C. M. Tenney, M. Massel, J. M. Mayes, M. Sen, J. F. Brennecke, E. J. A. Marginn, J. Chem. Eng. Data., 59 (2014) 391-399.

<sup>d</sup> Z.B. He, Z.C. Zhao, X.D. Zhang, H. Feng, Fluid Phase Equilibr., 298 (2010) 83-91.

**Table S3** The comparison of density and volume before and after CO<sub>2</sub> absorption at 303.15 K

| IL                                      | $\rho(\text{IL})$<br>/g·cm <sup>-3</sup> | $V(\text{IL})$<br>/cm <sup>3</sup> | $\rho(\text{IL}+\text{CO}_2)$<br>/g·cm <sup>-3</sup> | $V(\text{IL}+\text{CO}_2)$<br>/cm <sup>3</sup> | $\Delta V/\%$ |
|-----------------------------------------|------------------------------------------|------------------------------------|------------------------------------------------------|------------------------------------------------|---------------|
| [C <sub>4</sub> C <sub>1</sub> im][DBP] | 1.0392                                   | 11.503                             | 1.0445                                               | 11.746                                         | 2.11          |
| [C <sub>4</sub> C <sub>1</sub> im][DMP] | 1.1537                                   | 11.260                             | 1.1542                                               | 11.559                                         | 2.65          |
| [C <sub>2</sub> C <sub>1</sub> im][DEP] | 1.1403                                   | 10.104                             | 1.1426                                               | 10.337                                         | 2.31          |
| [C <sub>2</sub> C <sub>1</sub> im][DMP] | 1.2141                                   | 9.971                              | 1.2079                                               | 10.350                                         | 3.79          |
| [C <sub>1</sub> C <sub>1</sub> im][DMP] | 1.2562                                   | 9.483                              | 1.2527                                               | 9.783                                          | 3.15          |

**Table S4** Uncertainties of the used instruments in measurements

| Measurements                                 | Uncertainties |
|----------------------------------------------|---------------|
| Density/ ( $\text{g} \cdot \text{cm}^{-3}$ ) | 0.002         |
| Viscosity/ $\text{mPa} \cdot \text{s}$       | 0.05          |
| Solubility                                   | 0.005         |
| Temperatures of water bath/K                 | 0.05          |
| Pressure transmitter /kPa                    | 0.1           |
| Mass of ILs /g                               | 0.001         |

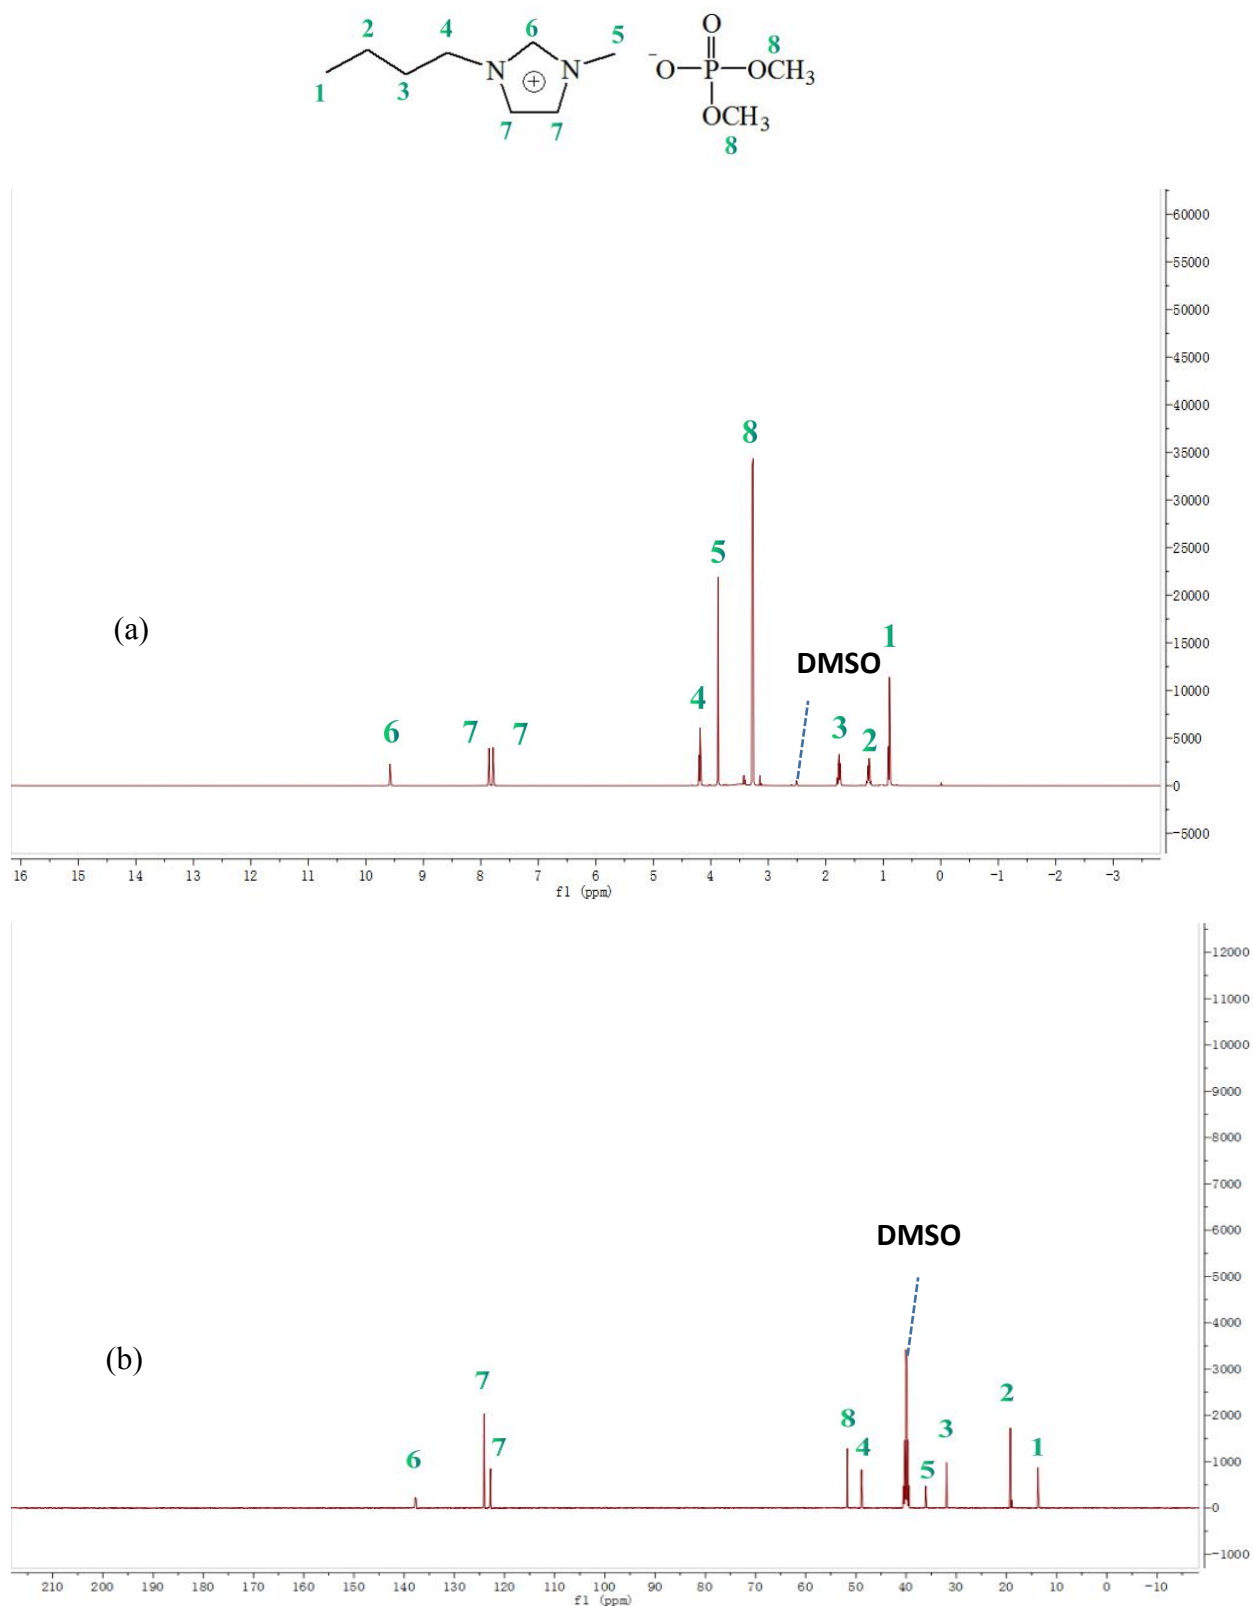

**Figure S1** NMR spectra for [C<sub>4</sub>C<sub>1</sub>im][DMP] (1-butyl-3-methylimidazolium dimethylphosphate) in DMSO-d<sub>6</sub> with tetramethylsilane (TMS) as the internal standard: (a) <sup>1</sup>H NMR and (b) <sup>13</sup>C NMR.

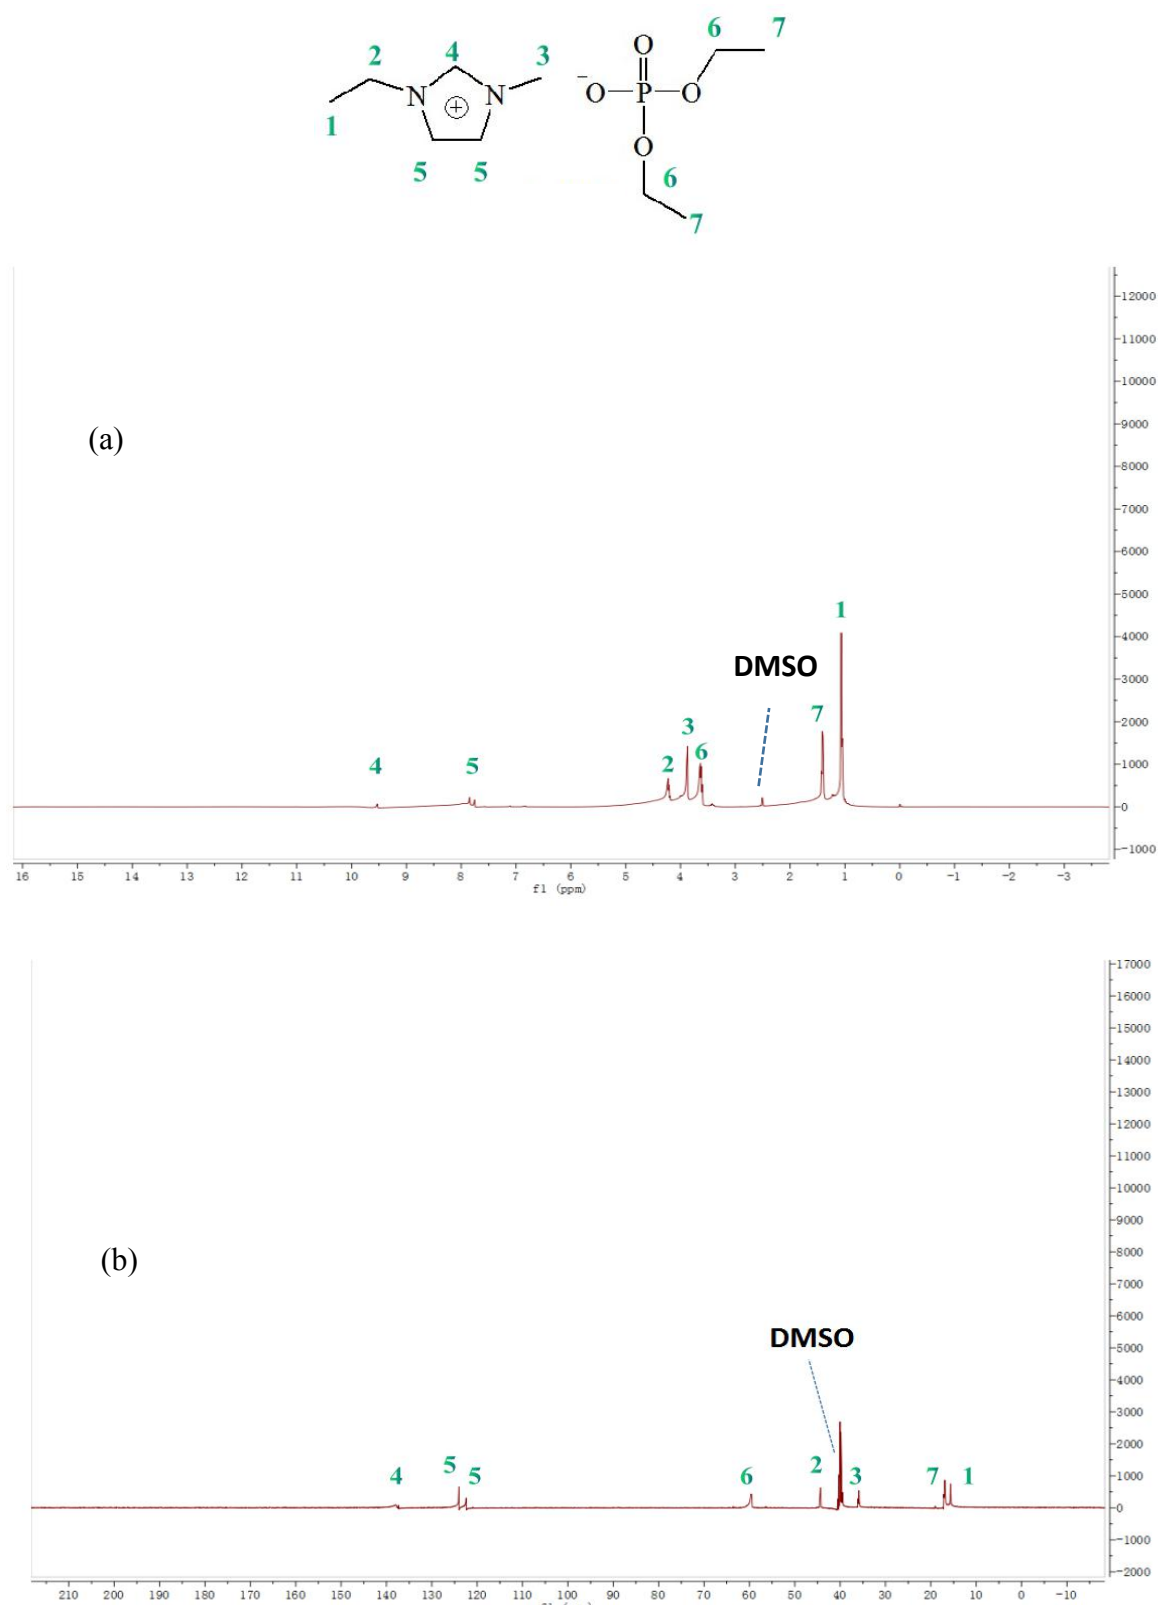

**Figure S2** NMR spectra for [C<sub>2</sub>C<sub>1</sub>im][DEP] (1-ethyl-3-methylimidazolium diethylphosphate) in DMSO-d<sub>6</sub> with tetramethylsilane (TMS) as the internal standard: (a) <sup>1</sup>H NMR and (b) <sup>13</sup>C NMR.

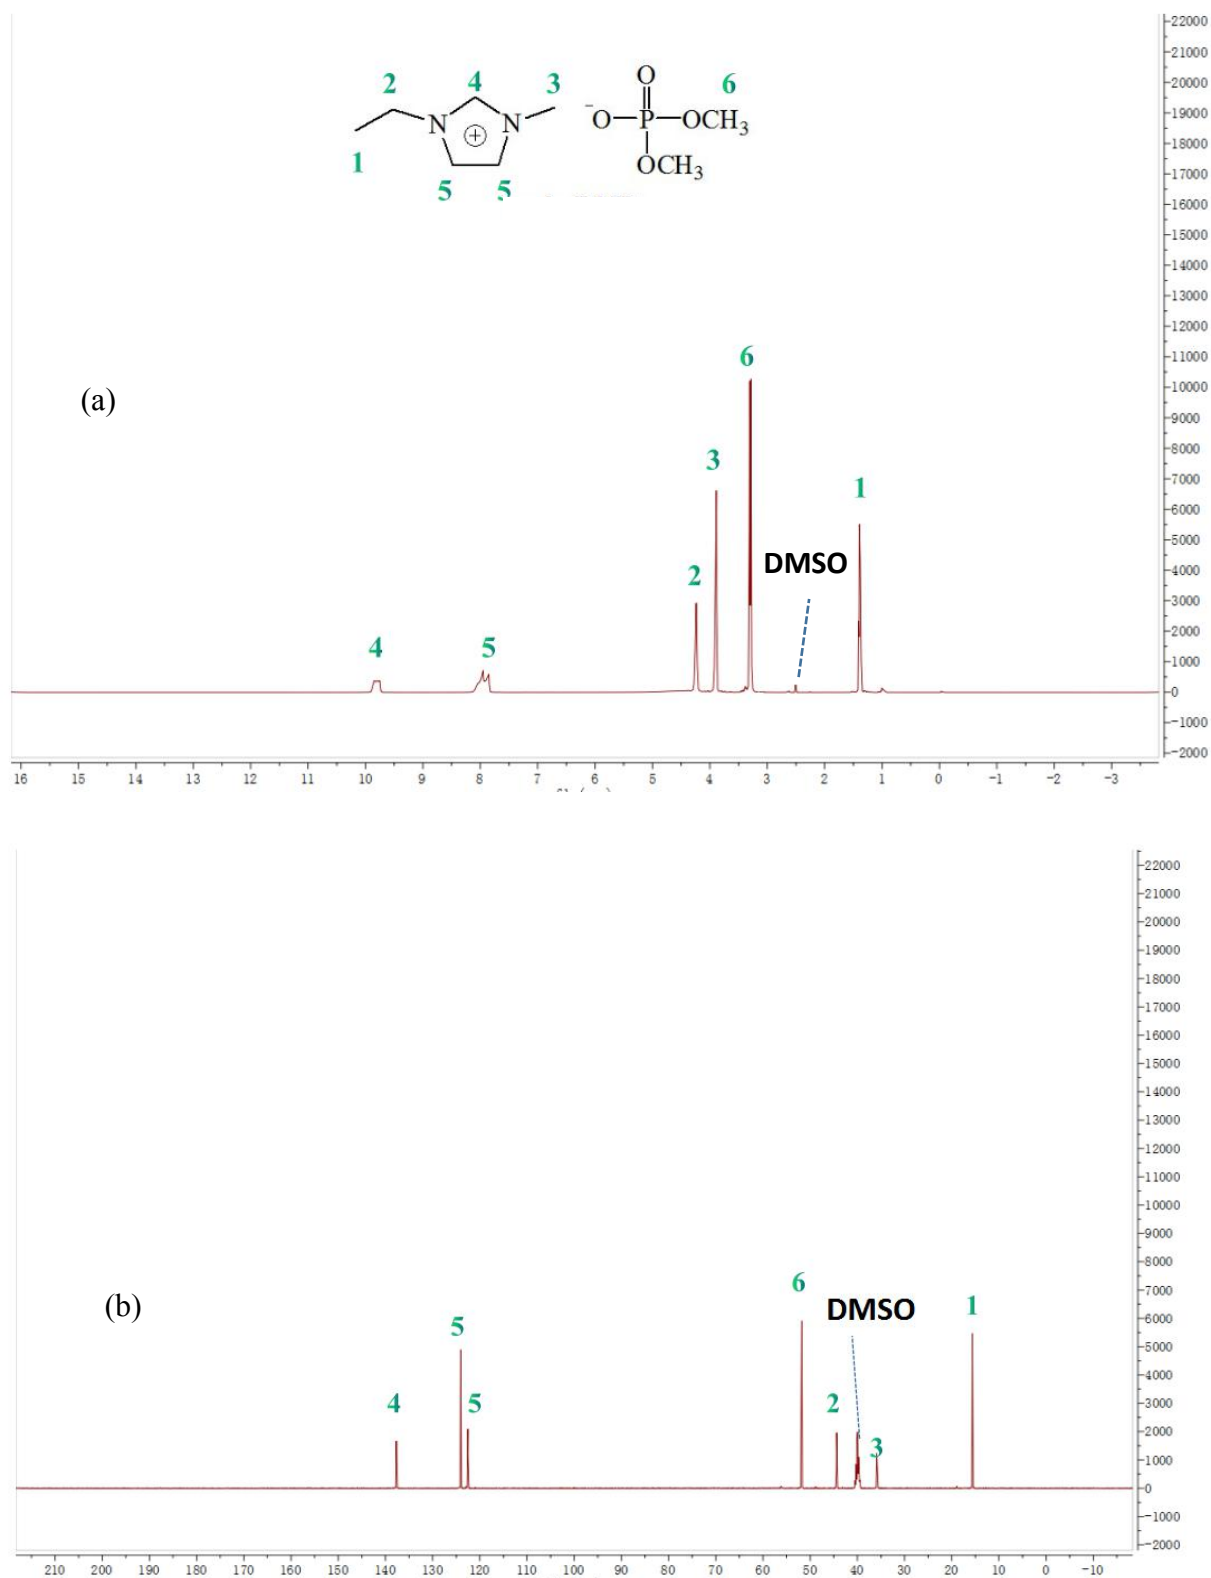

**Figure S3** NMR spectra for [C<sub>2</sub>C<sub>1</sub>im][DMP] (1-ethyl-3-methylimidazolium dimethylphosphate) in DMSO-d<sub>6</sub> with tetramethylsilane (TMS) as the internal standard: (a) <sup>1</sup>H NMR and (b) <sup>13</sup>C NMR.



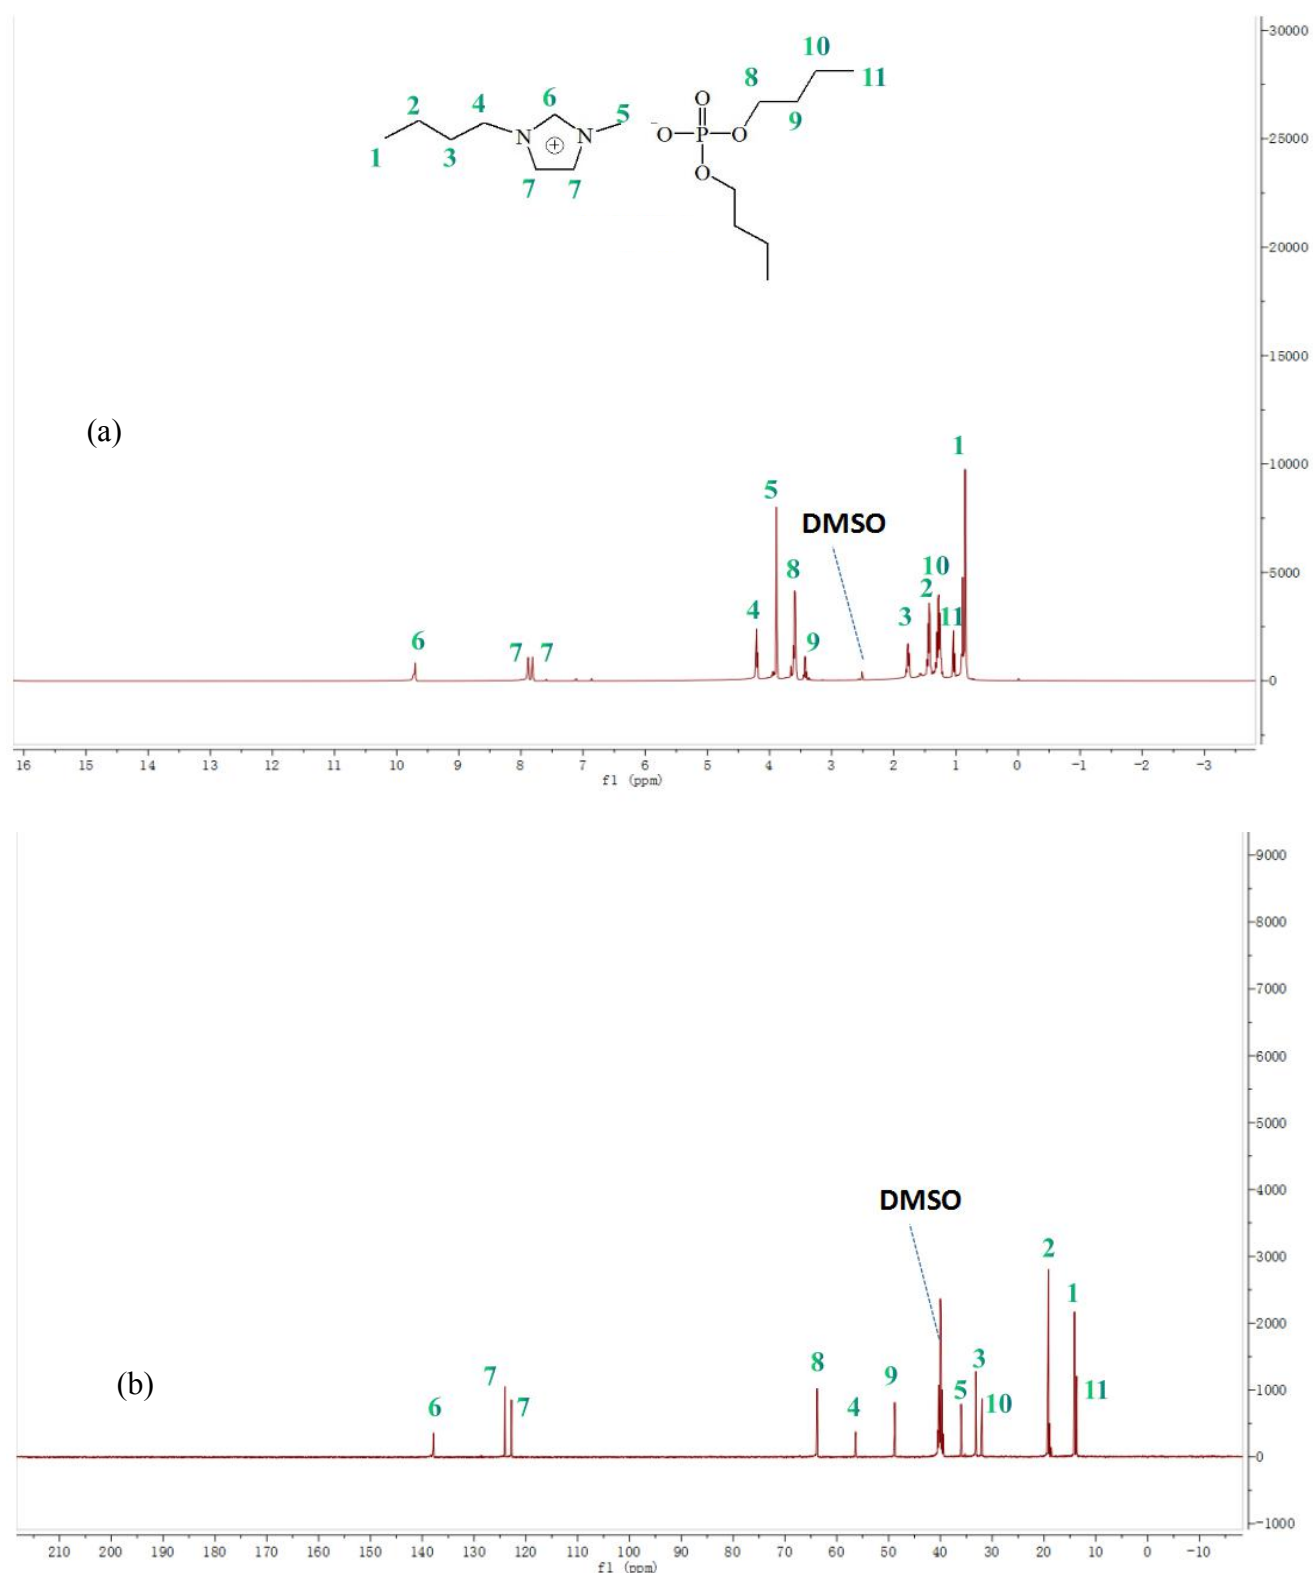

**Figure S4** NMR spectra for [C<sub>4</sub>C<sub>1</sub>im][DBP] (1-butyl-3-methylimidazolium dibutylphosphate) in DMSO-d<sub>6</sub> with tetramethylsilane (TMS) as the internal standard: (a) <sup>1</sup>H NMR and (b) <sup>13</sup>C NMR.

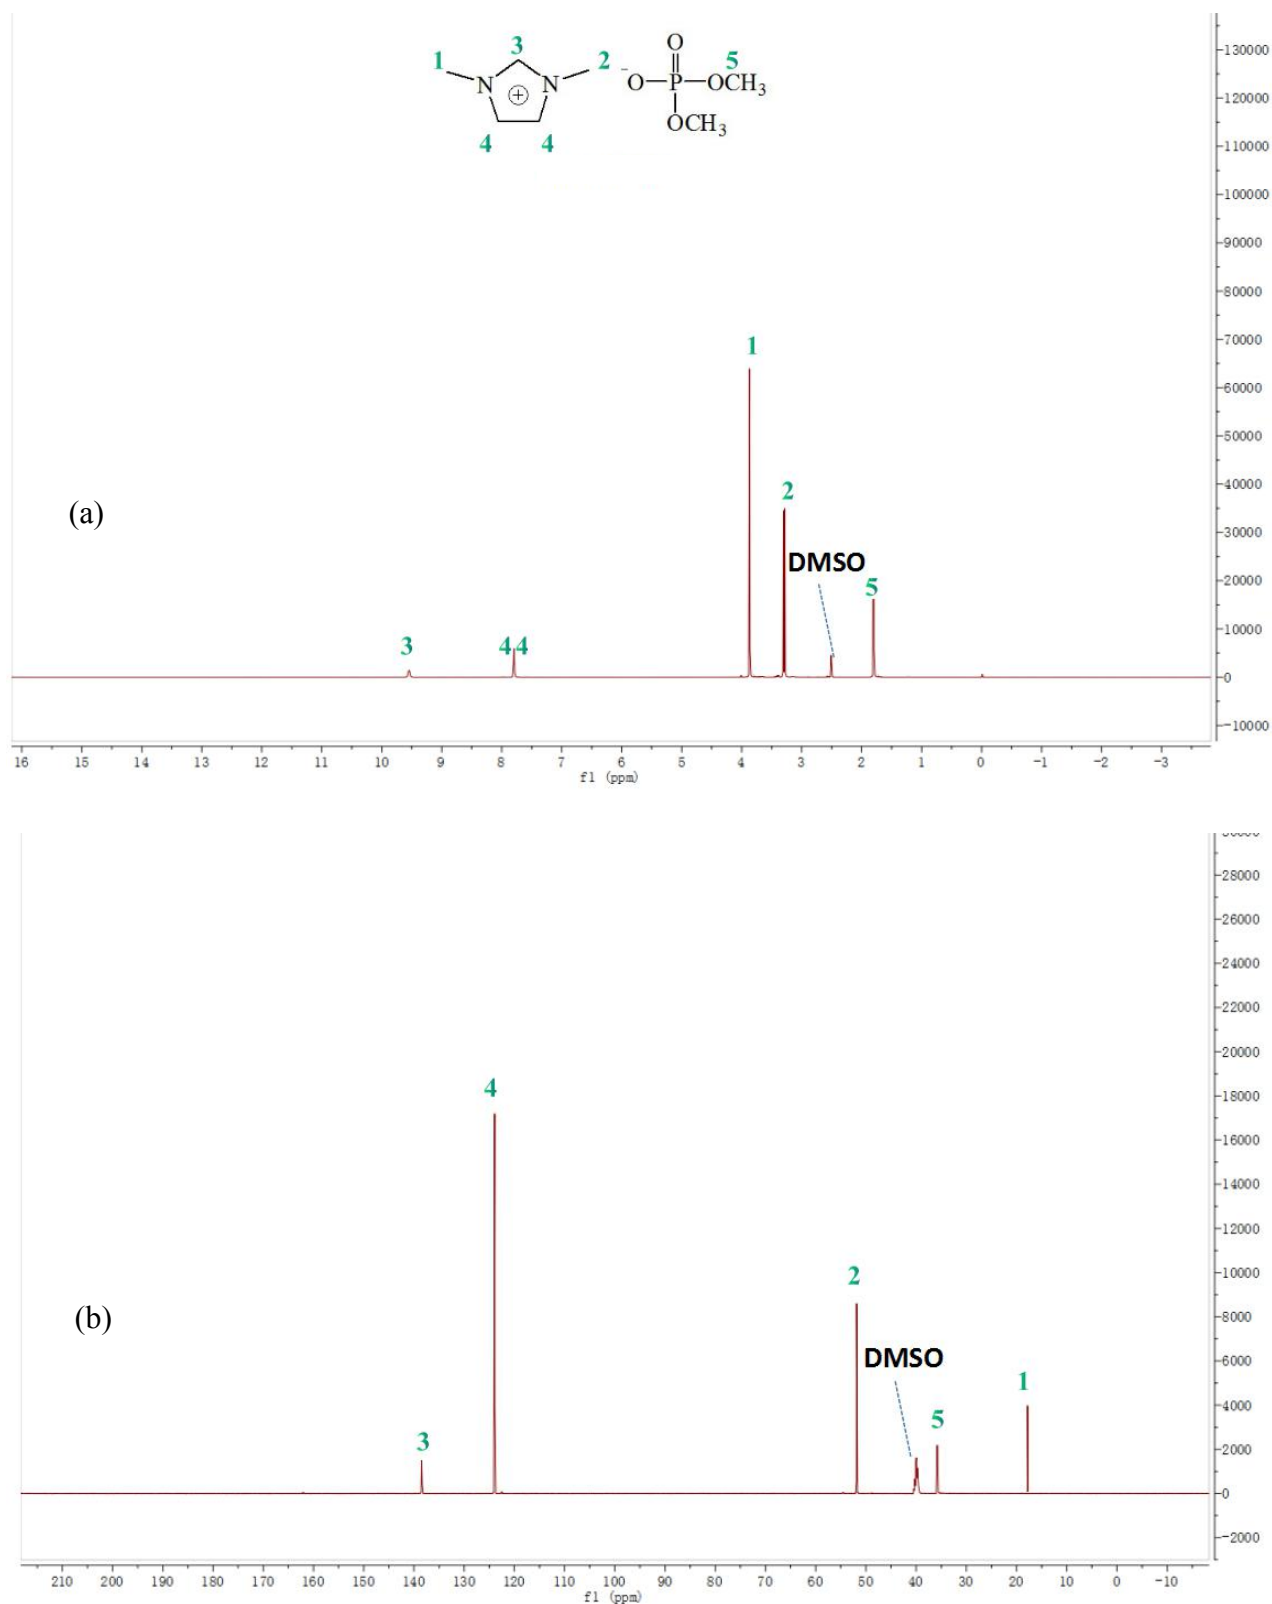

**Figure S5** NMR spectra for  $[C_1C_1im][DMP]$  (1,3-dimethylimidazolium dimethylphosphate) in  $DMSO-d_6$  with tetramethylsilane (TMS) as the internal standard: (a)  $^1H$  NMR and (b)  $^{13}C$  NMR.

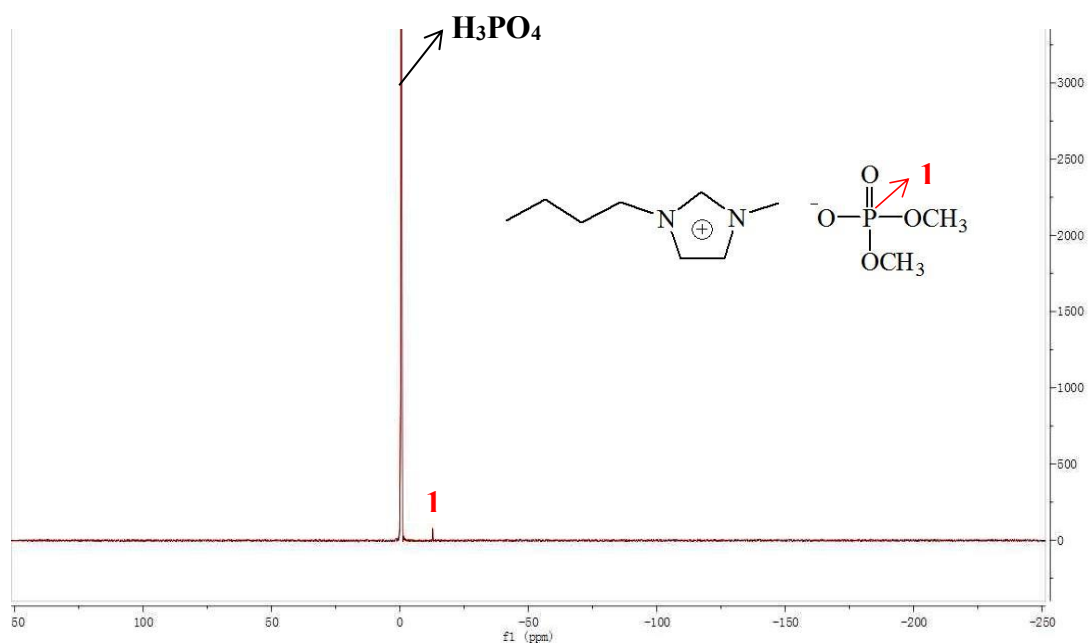

**Figure S6**  $^{31}\text{P}$  NMR spectra for  $[\text{C}_4\text{C}_1\text{im}][\text{DMP}]$  (1-butyl-3-methylimidazolium dimethylphosphate) in phosphoric acid as the internal standard.

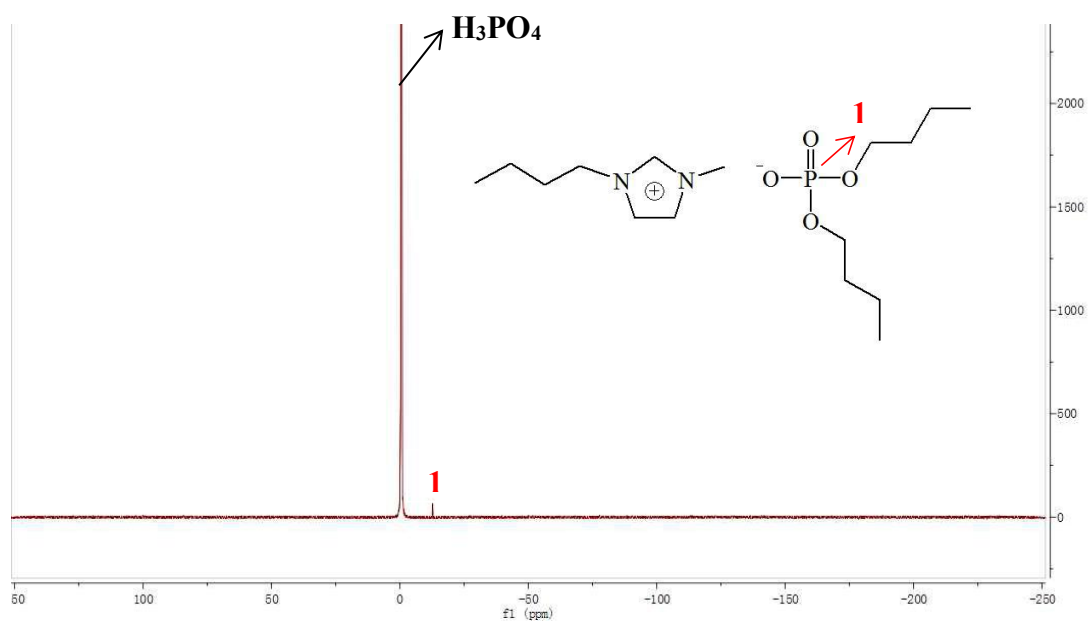

**Figure S7**  $^{31}\text{P}$  NMR spectra for  $[\text{C}_4\text{C}_1\text{im}][\text{DBP}]$  (1-butyl-3-methylimidazolium dibutylphosphate) in phosphoric acid as the internal standard.

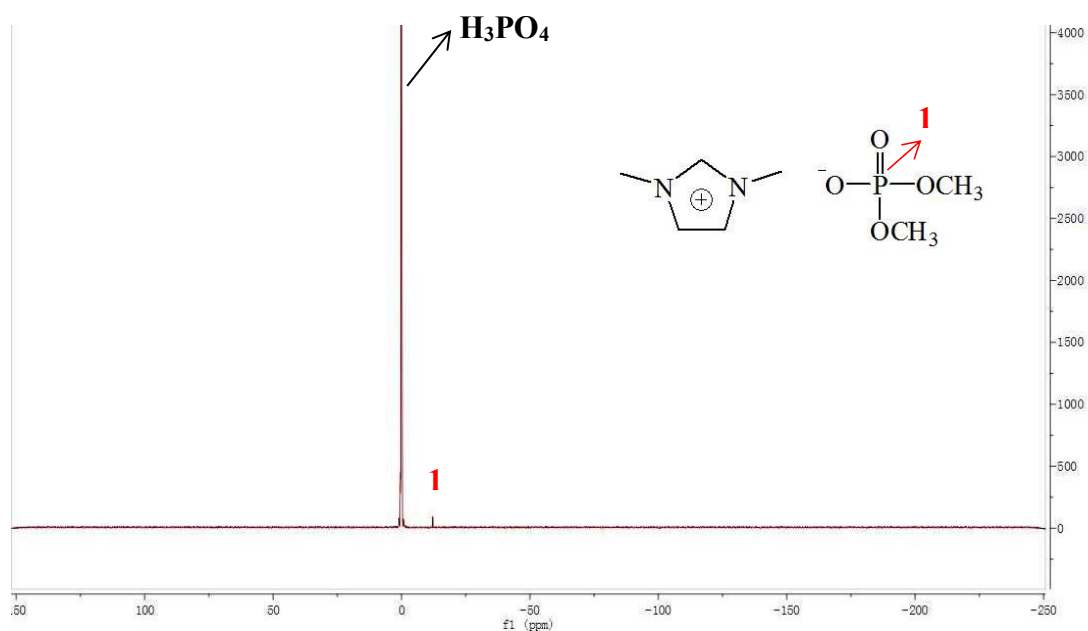

**Figure S8**  $^{31}\text{P}$  NMR spectra for  $[\text{C}_1\text{C}_1\text{im}][\text{DMP}]$  (1,3-dimethylimidazolium dimethylphosphate) in phosphoric acid as the internal standard.

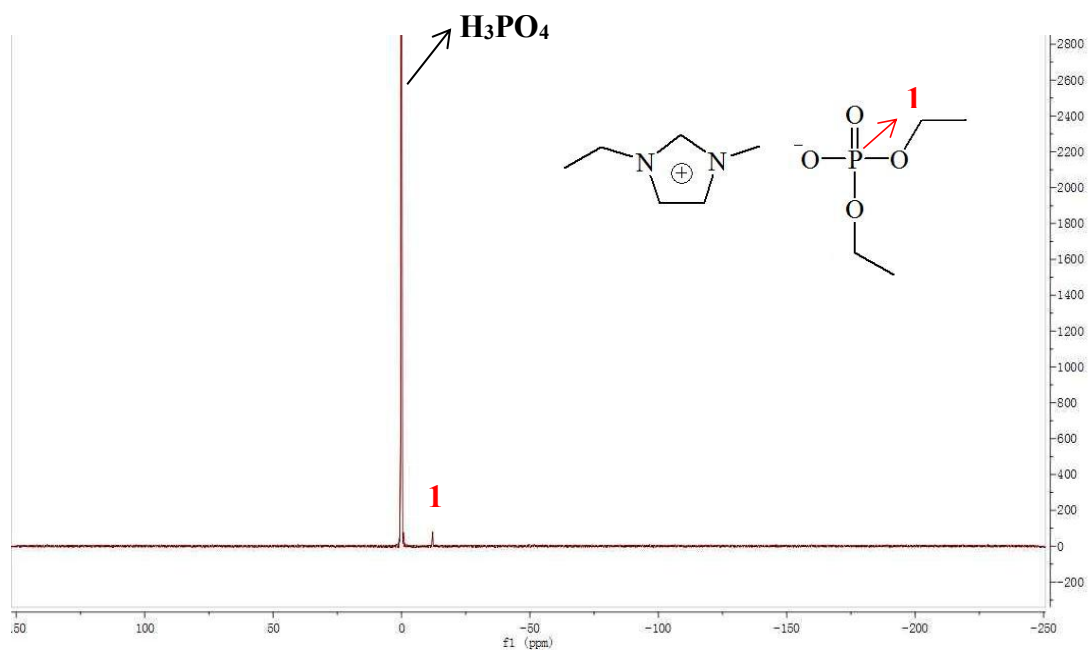

**Figure S9**  $^{31}\text{P}$  NMR spectra for  $[\text{C}_2\text{C}_1\text{im}][\text{DEP}]$  (1-ethyl-3-methylimidazolium diethylphosphate) in phosphoric acid as the internal standard.

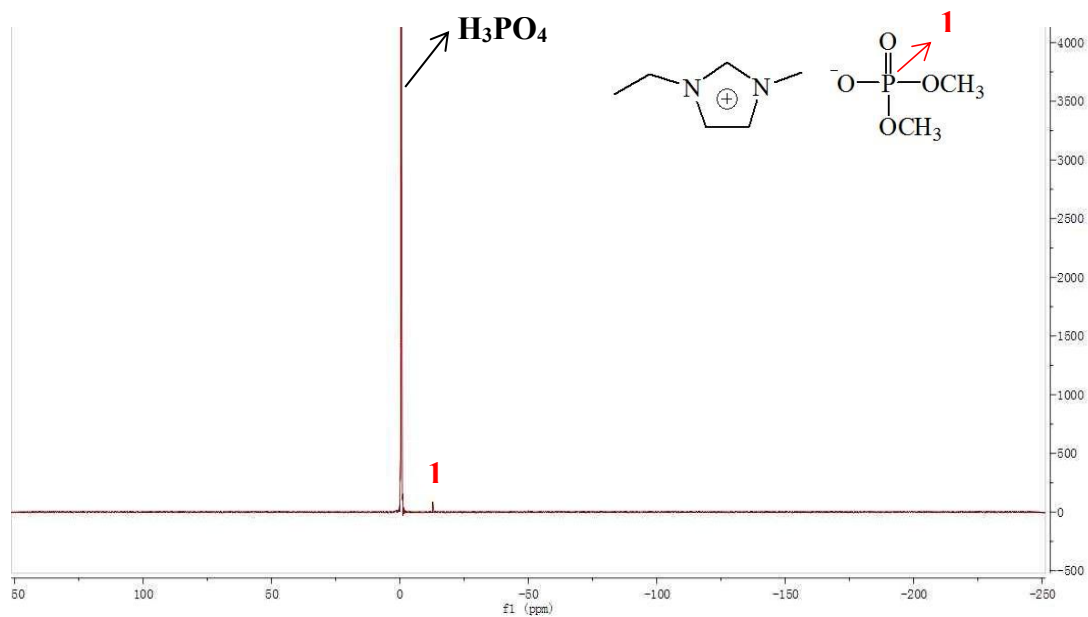

**Figure S10**  $^{31}\text{P}$  NMR spectra for  $[\text{C}_2\text{C}_1\text{im}][\text{DMP}]$  (1-ethyl-3-methylimidazolium dimethylphosphate) in phosphoric acid as the internal standard.

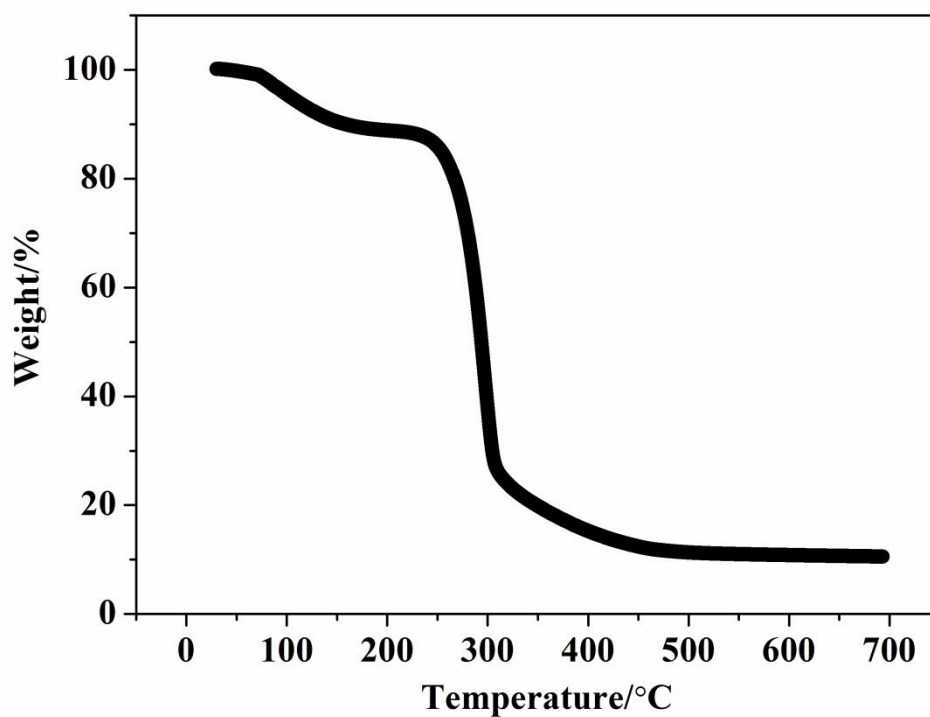

**Figure S11.** Scanning TGA results for  $[\text{C}_4\text{C}_1\text{im}][\text{DBP}]$  from room temperature with a  $10\text{ }^\circ\text{C}/\text{min}$  temperature ramping rate to  $700\text{ }^\circ\text{C}$ .

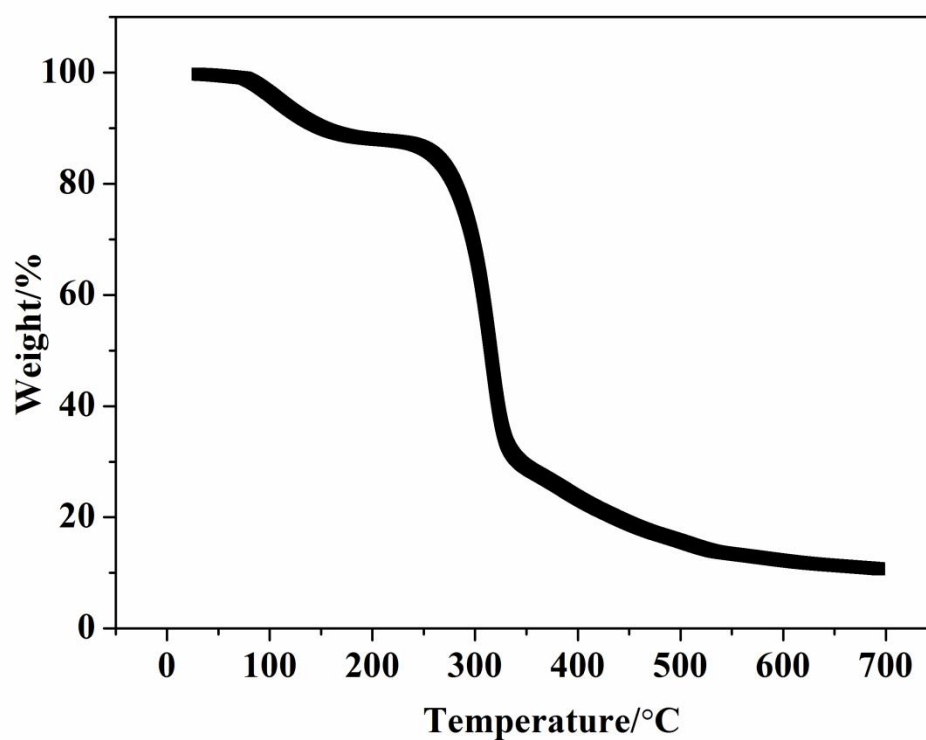

**Figure S12.** Scanning TGA results for [C<sub>4</sub>C<sub>1</sub>im][DMP] from room temperature with a 10 °C/min temperature ramping rate to 700 °C.

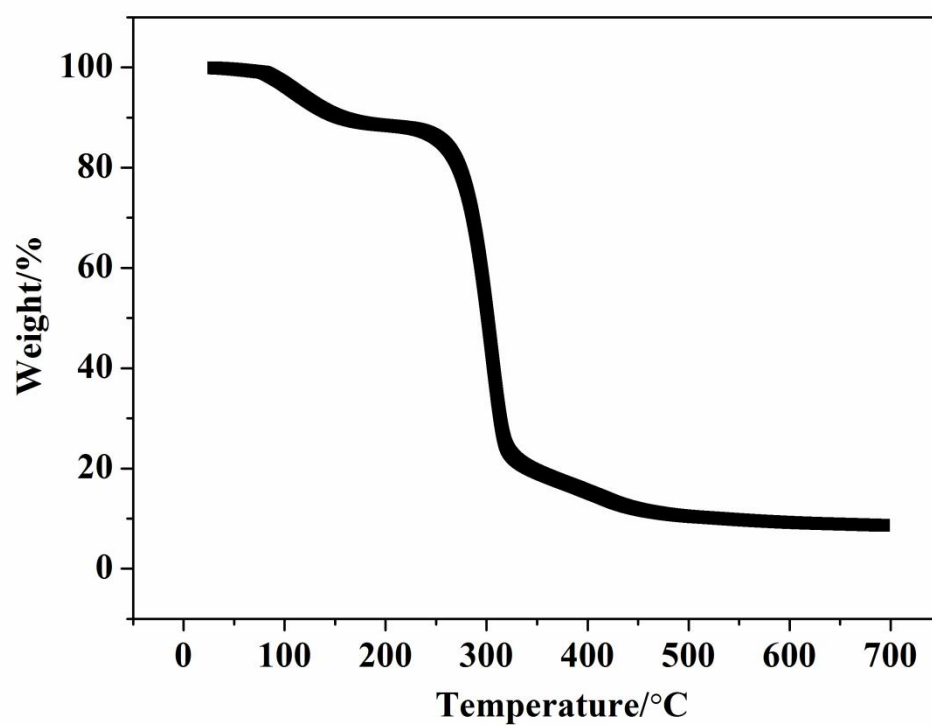

**Figure S13.** Scanning TGA results for [C<sub>2</sub>C<sub>1</sub>im][DEP] from room temperature with a 10 °C/min temperature ramping rate to 700 °C.

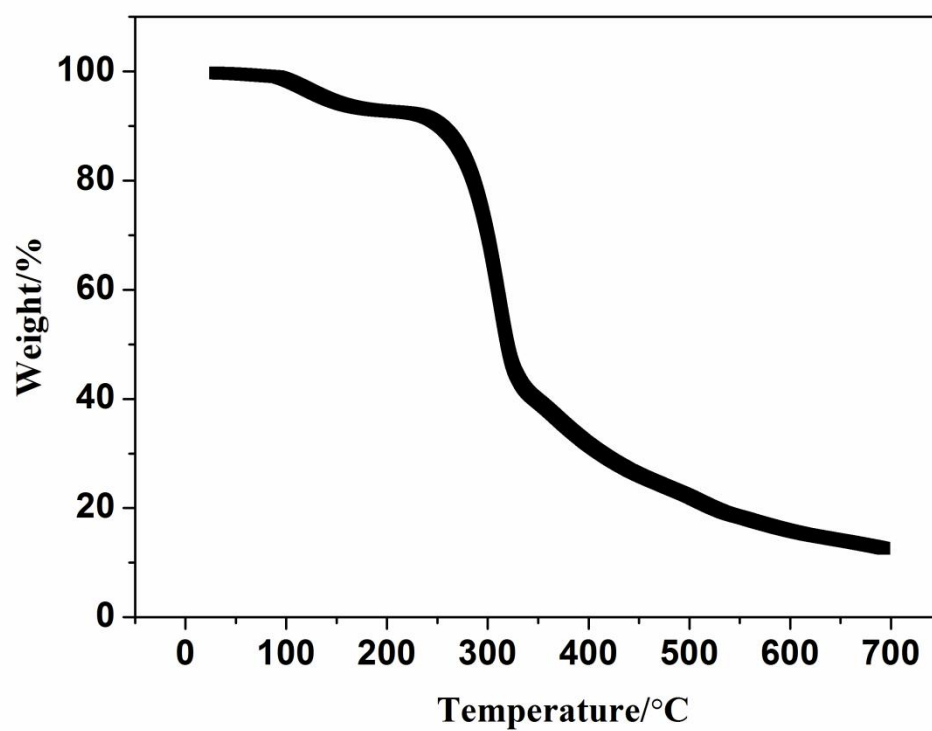

**Figure S14.** Scanning TGA results for [C<sub>2</sub>C<sub>1</sub>im][DMP] from room temperature with a 10 °C/min temperature ramping rate to 700 °C.



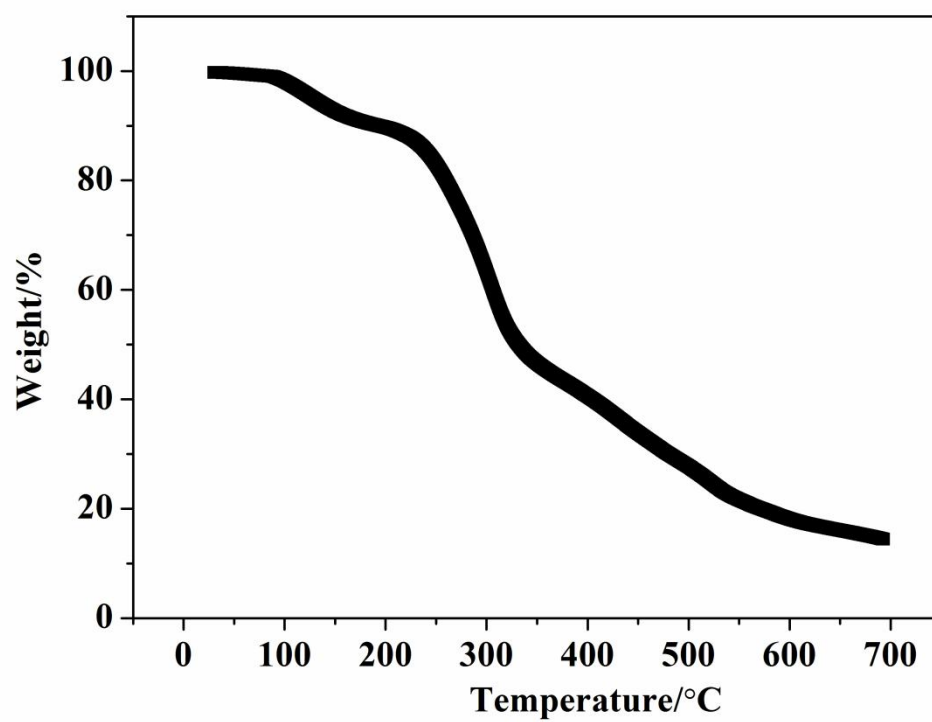

**Figure S15.** Scanning TGA results for [C<sub>1</sub>C<sub>1</sub>im][DMP] from room temperature with a 10 °C/min temperature ramping rate to 700 °C.

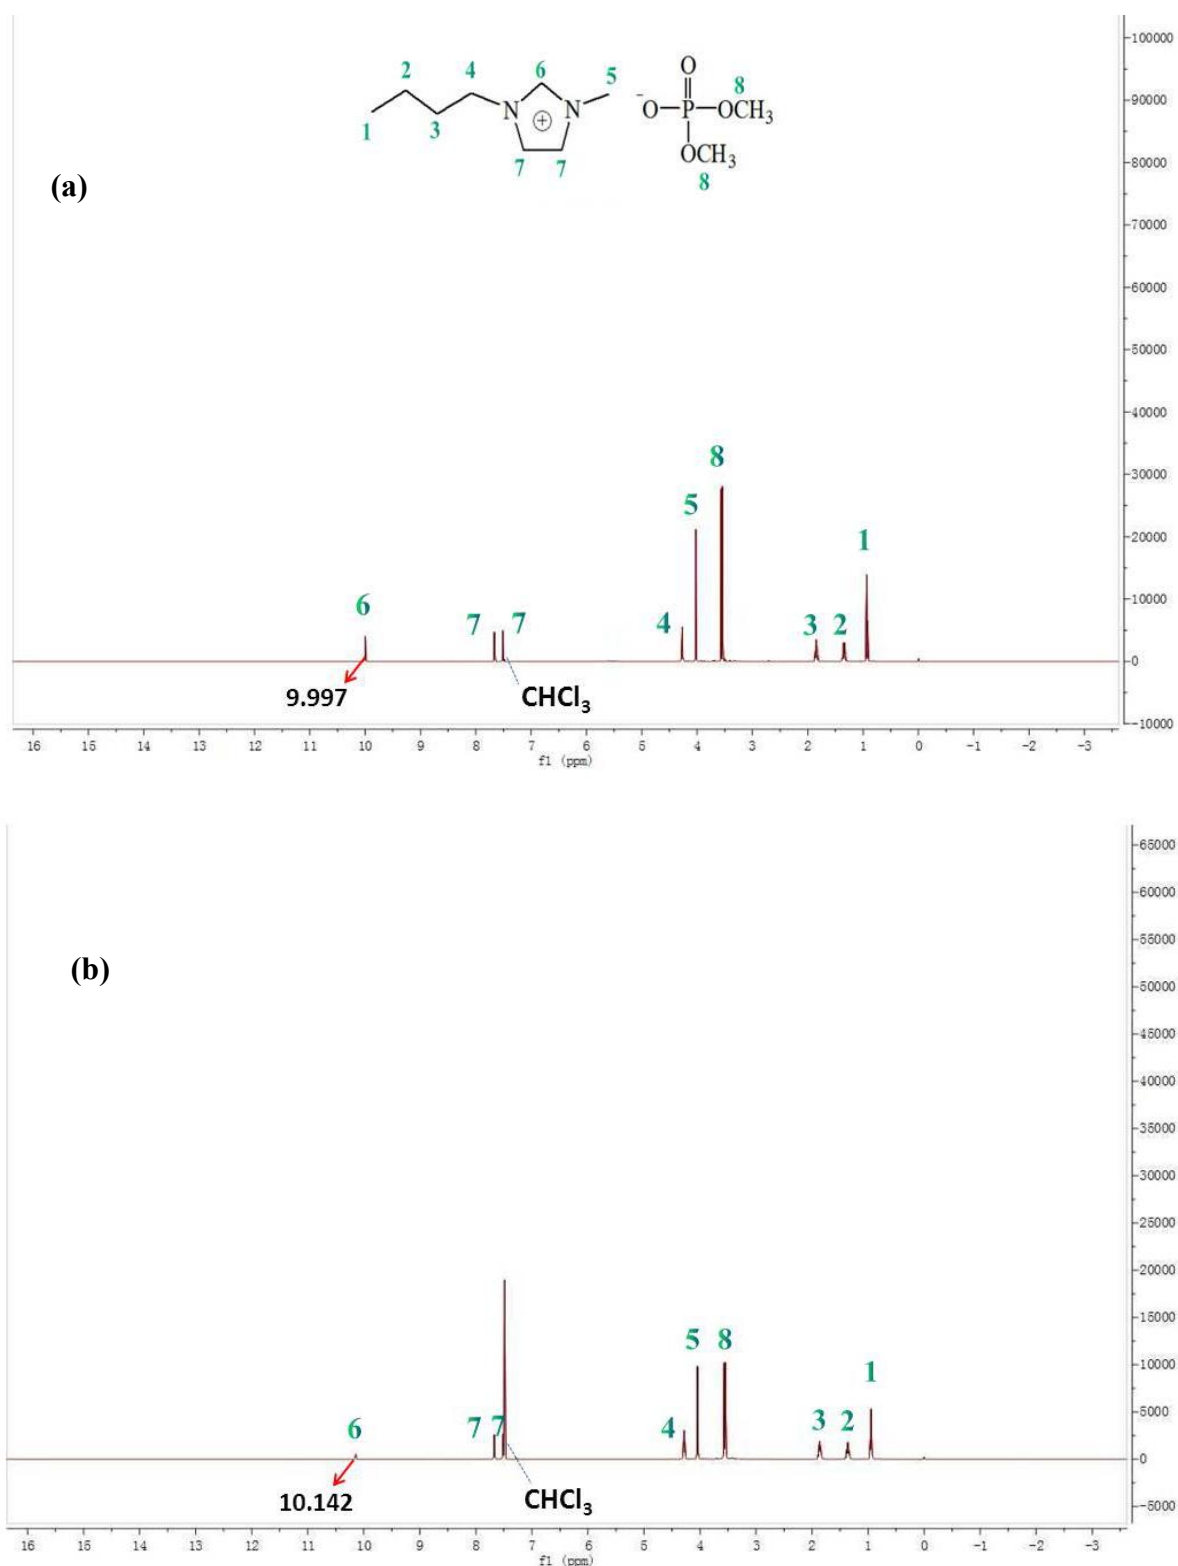

**Figure S16**  $^1\text{H}$  NMR spectra for  $[\text{C}_4\text{C}_{1\text{im}}][\text{DMP}]$  (1-butyl-3-methylimidazolium dimethylphosphate) in  $\text{CDCl}_3$  with tetramethylsilane (TMS) as the internal standard: (a) fresh ionic liquid; (b) ionic liquid+ $\text{NH}_3$ .

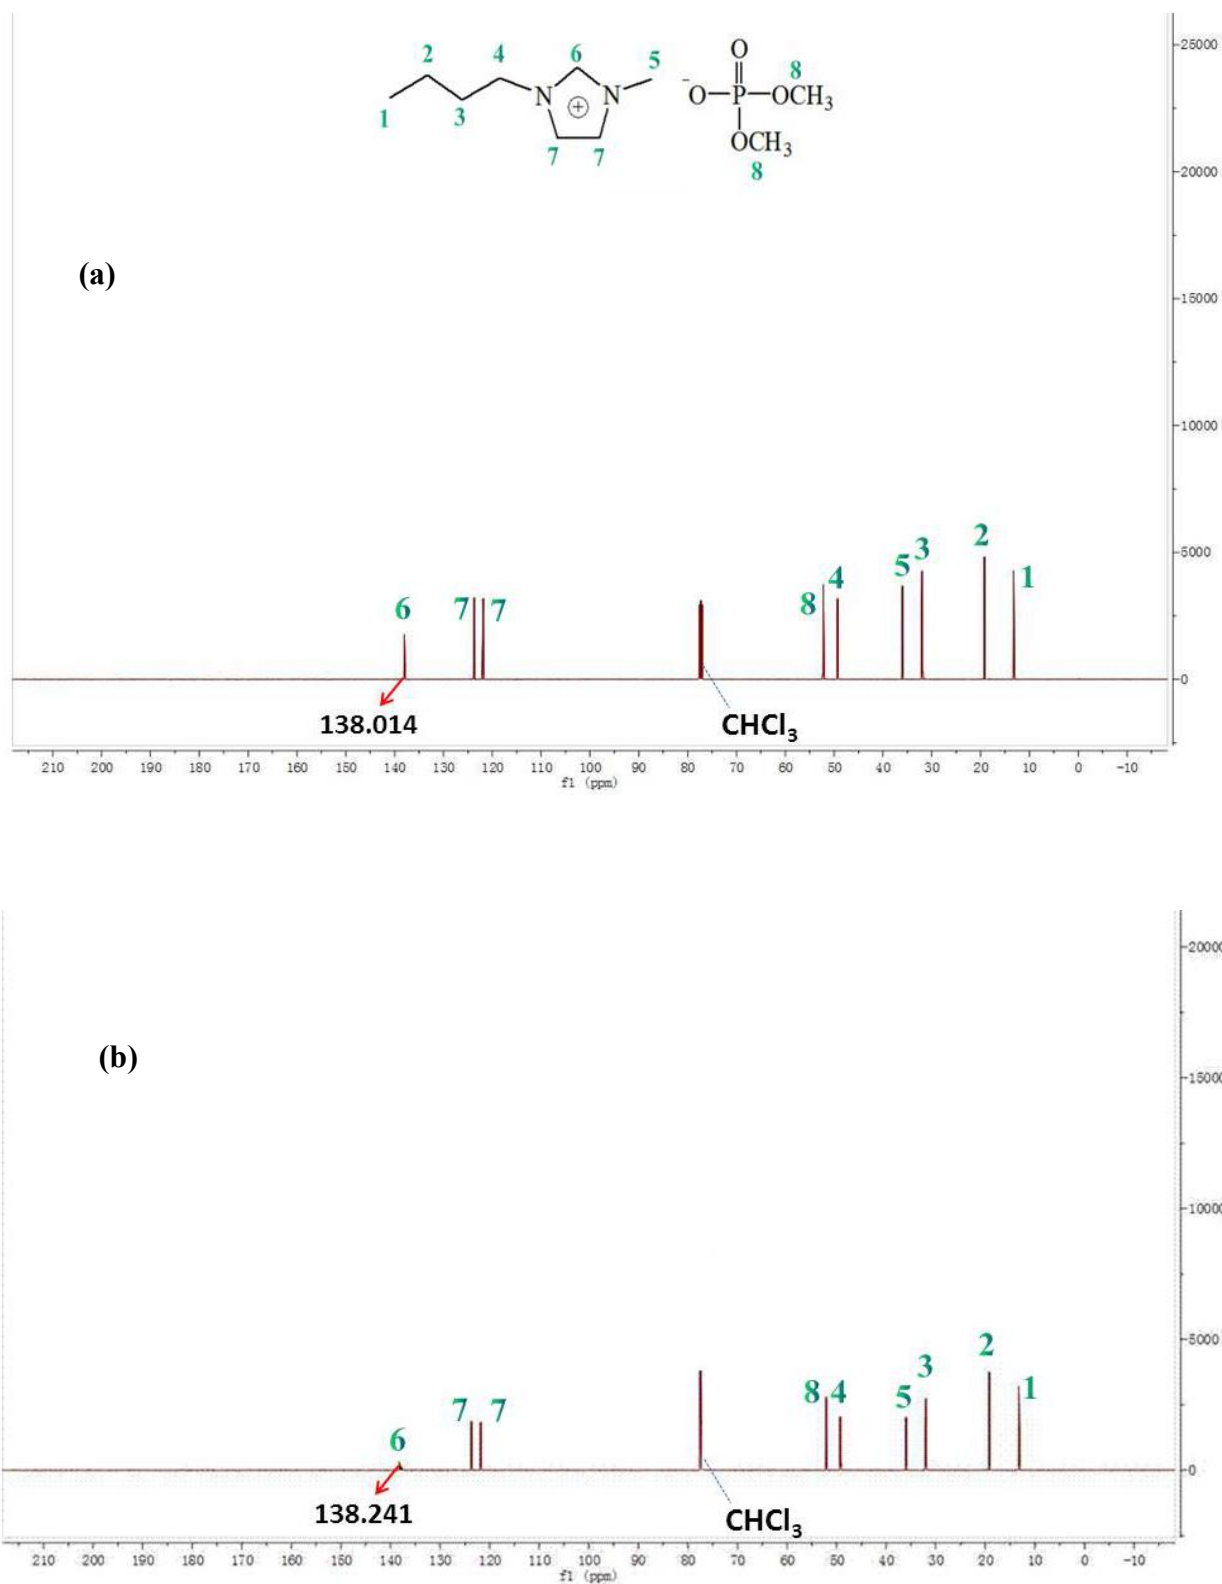

**Figure S17**  $^{13}\text{C}$  NMR spectra for  $[\text{C}_4\text{C}_1\text{im}][\text{DMP}]$  (1-butyl-3-methylimidazolium dimethylphosphate) in  $\text{CDCl}_3$  with tetramethylsilane (TMS) as the internal standard: (a) fresh ionic liquid; (b) ionic liquid+ $\text{NH}_3$ .

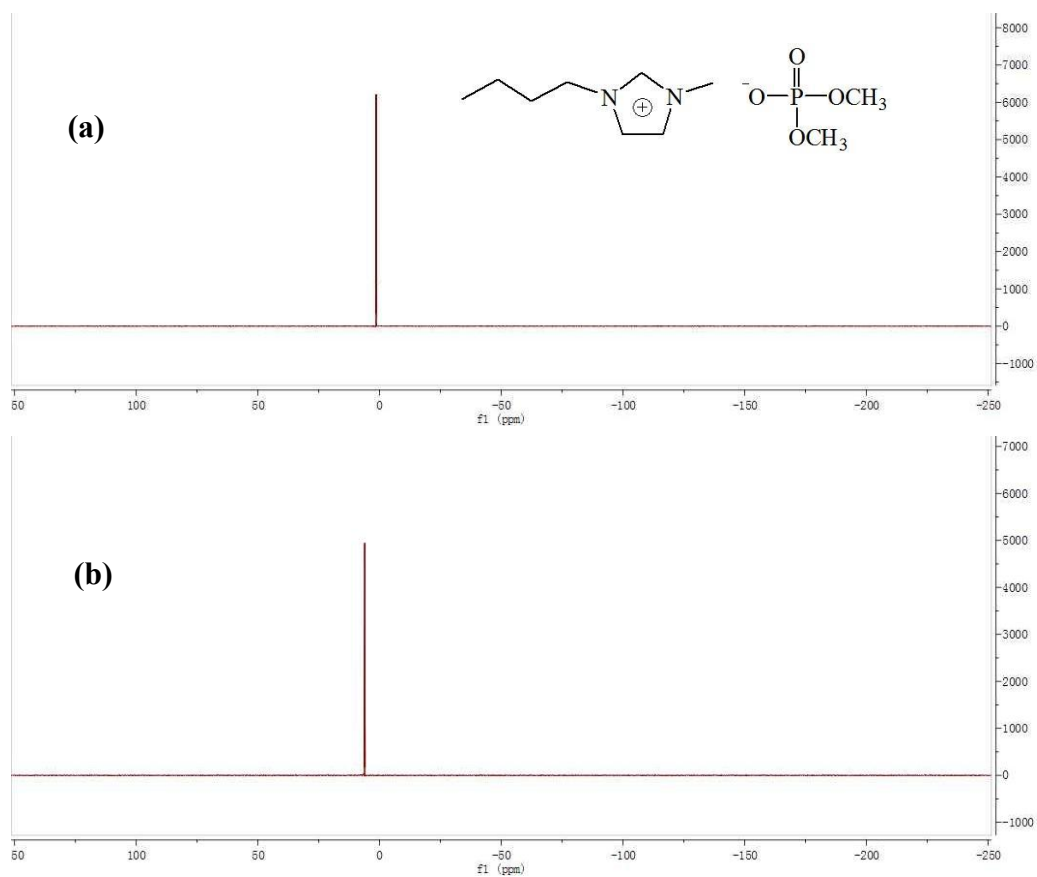

**Figure S18**  $^{31}\text{P}$  NMR spectra for [C<sub>4</sub>C<sub>1</sub>im][DMP] (1-butyl-3-methylimidazolium dimethylphosphate): (a) fresh ionic liquid; (b) ionic liquid+NH<sub>3</sub>.

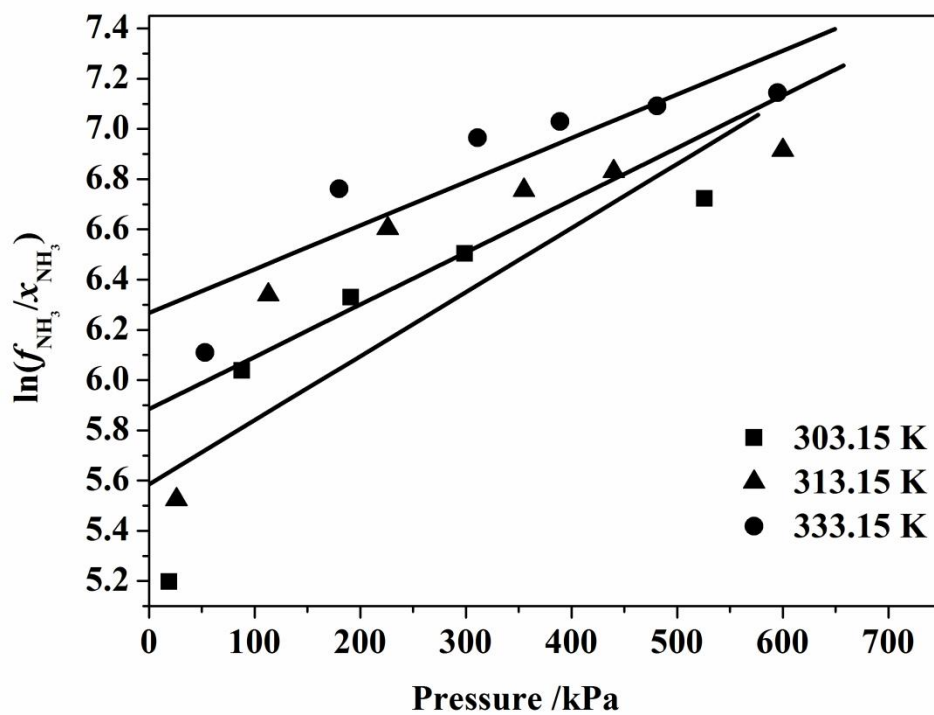

**Figure S19** K-K equation analysis of the solubilities of  $\text{NH}_3$  in  $[\text{C}_4\text{C}_{1\text{im}}][\text{DMP}]$

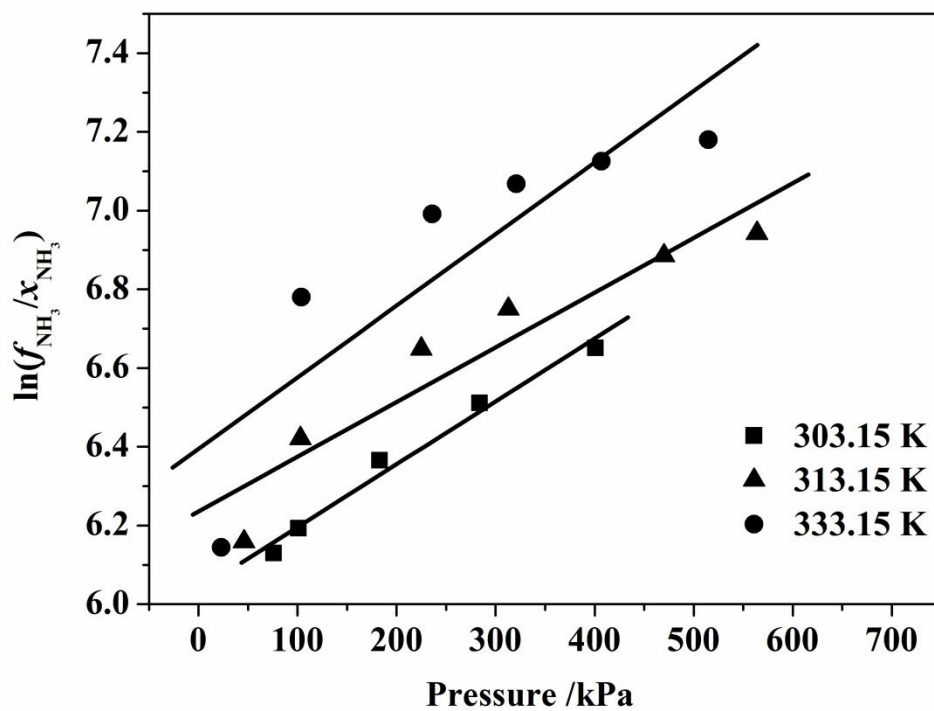

**Figure S20** K-K equation analysis of the solubilities of  $\text{NH}_3$  in  $[\text{C}_2\text{C}_{1\text{im}}][\text{DEP}]$

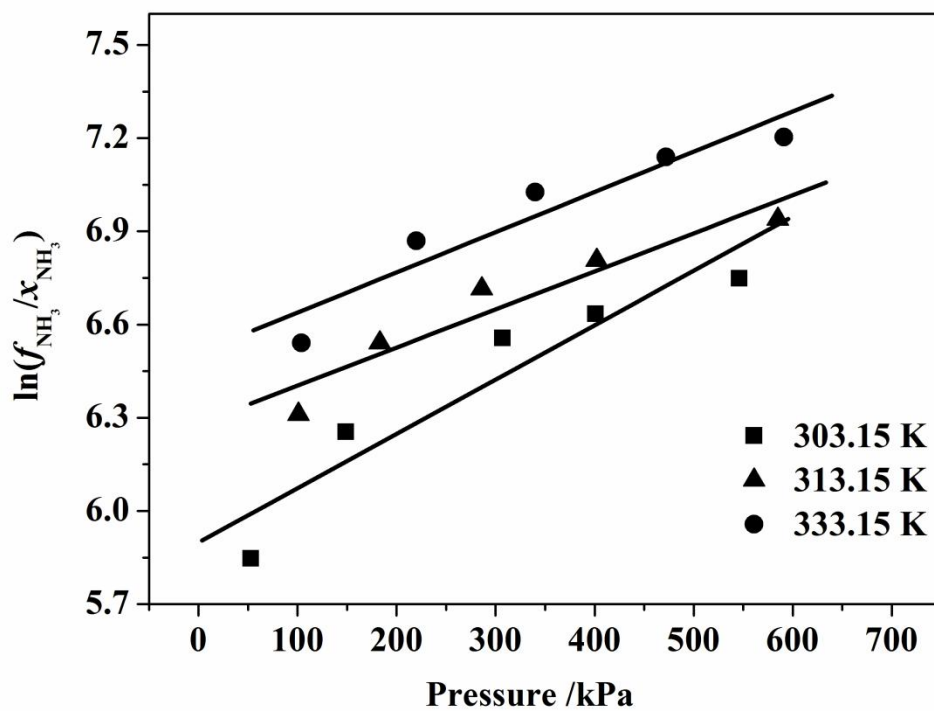

**Figure S21** K-K equation analysis of the solubilities of  $\text{NH}_3$  in  $[\text{C}_2\text{C}_{1\text{im}}][\text{DMP}]$

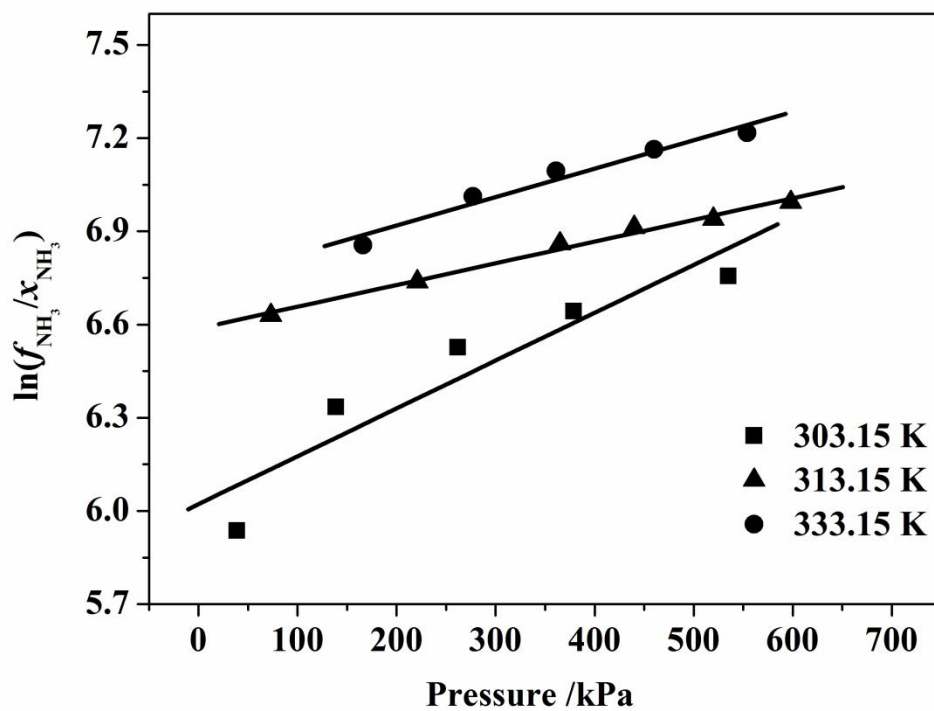

**Figure S22** K-K equation analysis of the solubilities of  $\text{NH}_3$  in  $[\text{C}_1\text{C}_1\text{im}][\text{DMP}]$



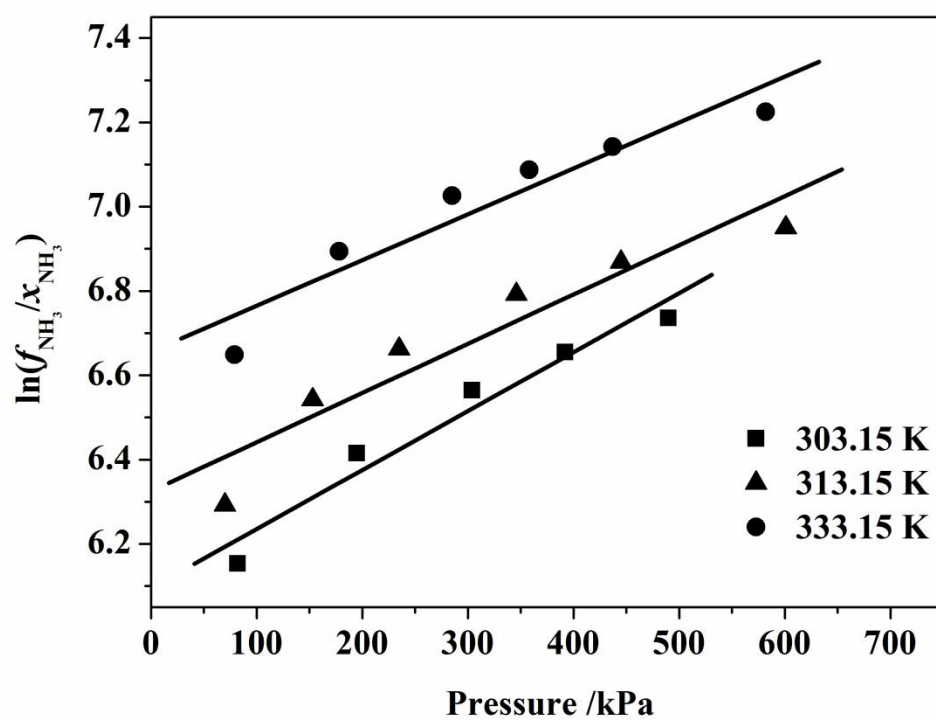

**Figure S23** K-K equation analysis of the solubilities of  $\text{NH}_3$  in  $[\text{C}_4\text{C}_{1\text{im}}][\text{DBP}]$

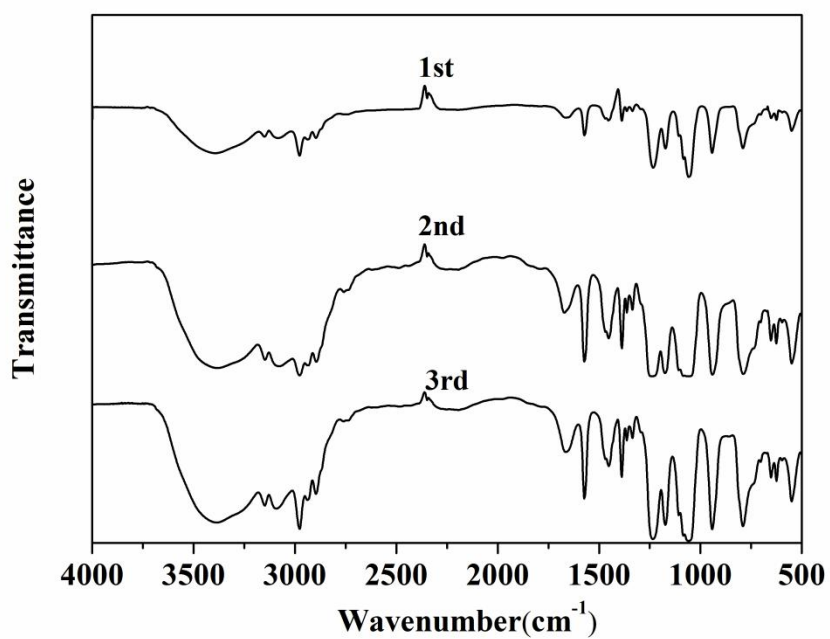

**Figure S24** FT-IR spectra of three consecutive cycles of  $\text{NH}_3$  absorption and desorption in  $[\text{C}_2\text{C}_1\text{im}][\text{DEP}]$

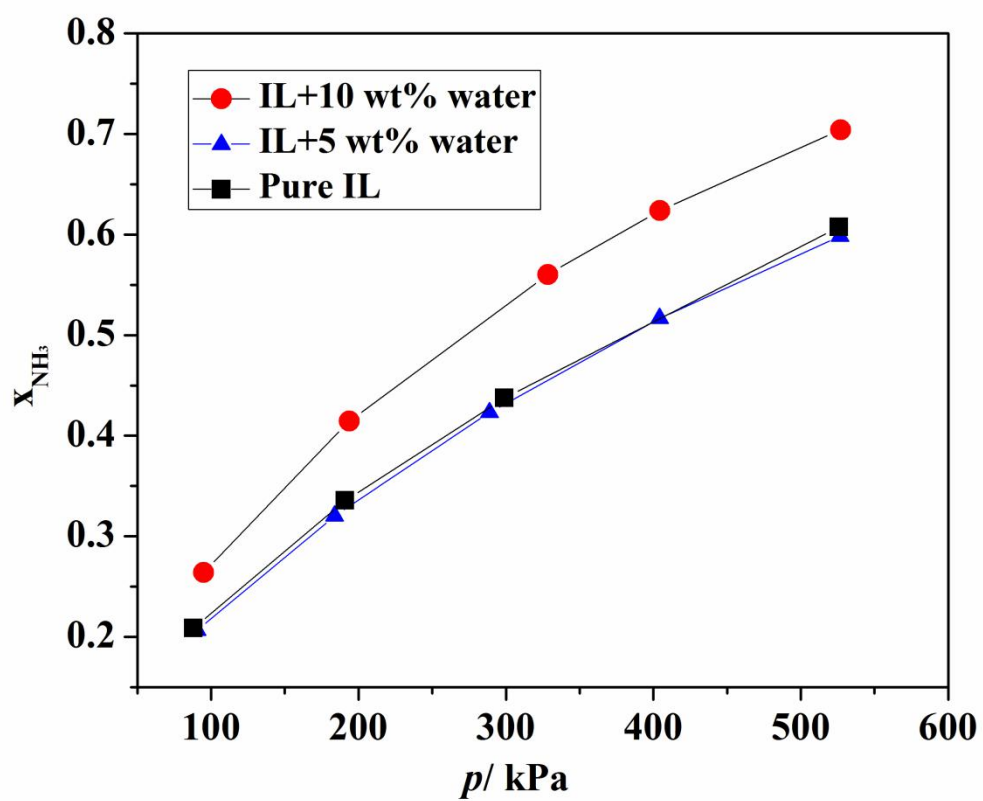

**Figure S25** The effect of water on  $\text{NH}_3$  absorption in  $[\text{C}_4\text{C}_{1\text{im}}][\text{DMP}]$  at 303.15 K
